# Supplementary material for: Determination of the Probabilistic Properties of the Critical Fracture Energy of Concrete Integrating Scale Effect Aspects
Source: MDPI journal article supplement (doi:10.3390/app14010462), 2024-01-04
Supplement: s1 [file s1]

## Article

# Determination of the Probabilistic Properties of the Critical Fracture Energy of Concrete Integrating Scale Effect Aspects

Mariane Rodrigues Rita , Pierre Rossi \* , Eduardo de Moraes Rego Fairbairn   
and Fernando Luiz Bastos Ribeiro 

Civil Engineering Program, Universidade Federal do Rio de Janeiro (UFRJ), Av. Horácio Macedo, 2030, Cidade Universitária, Rio de Janeiro, 21941-598, Brazil; mariane\_rita@numats.coc.ufrj.br (M.R.R.); eduardo@coc.ufrj.br (E.d.M.R.F.); fernando@coc.ufrj.br (F.L.B.R.)

\* Correspondence: p.lupo@yahoo.fr

## Supplementary Material

This supplementary material presents in detail the algebraic manipulations used to deduce Equation (8), which correlates the coefficient of variation of critical fracture energy ( $\frac{\sigma}{\mu}(G_{IC})$ ) with the coefficient of variation of the material's tensile strength ( $\frac{\sigma}{\mu}(f_t)$ ). With this aim, the degree of material heterogeneity ( $r_e$ ) is isolated from the equation for estimating  $\frac{\sigma}{\mu}(f_t)$ . Subsequently, the same procedure is applied to the equation estimating  $\frac{\sigma}{\mu}(G_{IC})$ . Finally, by equating the obtained equations, Equation (8).

### S1. Coefficient of Variation of Tensile Strength:

The coefficient of variation for tensile strength is represented by Equation S1. This value is determined by considering the ratio  $r_e$ , the compressive strength of concrete ( $f_c$ ), and the estimated mean value of tensile strength ( $\mu(f_t)$ ) and its standard deviation ( $\sigma(f_t)$ ).

$$\frac{\sigma}{\mu}(f_t(r_e)) = c(r_e)^{-d} \quad (S1)$$

where,  $c = 0.35$  and  $d$  is given by Equation (S2), being the constant  $\alpha = 1 \text{ MPa}$ .

$$d = 4.5 \times 10^{-2} + 4.5 \times 10^{-3} \left( \frac{f_c}{\alpha} \right) - 1.8 \times 10^{-5} \left( \frac{f_c}{\alpha} \right)^2 \quad (S2)$$

Therefore, by considering Equation (S1), the following algebraic manipulations can be done and the following can be written:

$$\ln \left( \frac{\sigma(f_t)}{c\mu(f_t)} \right) = \ln(r_e)^{-d} \quad (S3)$$

$$\ln(\sigma(f_t)) - (\ln(\mu(f_t)) + \ln(c)) = -d \ln(r_e) \quad (S4)$$

$$-\frac{1}{d} [\ln(\sigma(f_t)) - (\ln(\mu(f_t)) + \ln(c))] = \ln(r_e) \quad (S5)$$

$$\exp \left( -\frac{1}{d} [\ln(\sigma(f_t)) - (\ln(\mu(f_t)) + \ln(c))] \right) = \exp(\ln(r_e)) \quad (S6)$$

$$r_e = \exp \left( \frac{1}{d} [-\ln(\sigma(f_t)) + (\ln(\mu(f_t)) + \ln(c))] \right) \quad (S7)$$

$$r_e = \exp \left( \frac{1}{d} \ln \left( \frac{\mu(f_t)c}{\sigma(f_t)} \right) \right) = \left( \frac{\mu(f_t)c}{\sigma(f_t)} \right)^{\frac{1}{d}} \quad (S8)$$

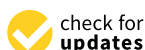

**Citation:** Rita, M.R.; Rossi, P.; Fairbairn, E.d.M.R.; Ribeiro, F.L.B. Determination of the Probabilistic Properties of the Critical Fracture Energy of Concrete Integrating Scale Effect Aspects. *Appl. Sci.* **2024**, *14*, 462. <https://doi.org/10.3390/app14010462>

Academic Editor: Valerio Belardi

Received: 4 December 2023

Revised: 23 December 2023

Accepted: 28 December 2023

Published: 4 January 2024

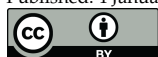

**Copyright:** © 2024 by the authors. Licensee MDPI, Basel, Switzerland. This article is an open access article distributed under the terms and conditions of the Creative Commons Attribution (CC BY) license (<https://creativecommons.org/licenses/by/4.0/>).

### S2. Coefficient of Variation of Fracture Energy:

The coefficient of variation of fracture energy is determined by Equation (S9). As observed, its calculation also involves the consideration of the ratio  $r_e$ .

$$\frac{\sigma(G_{IC})}{\mu(G_{IC})} = (A \ln(r_e) + B) \quad (S9)$$

where,  $A = -8.538$  and  $B = 70.88$  and  $\mu(G_{IC})$  is the mean value of critical fracture energy.

$$\frac{\sigma(G_{IC})}{\mu(G_{IC})} - B = A \ln(r_e) \quad (S10)$$

$$\frac{\sigma(G_{IC}) - B\mu(G_{IC})}{A\mu(G_{IC})} = \ln(r_e) \quad (S11)$$

$$\exp\left(\frac{\sigma(G_{IC}) - B\mu(G_{IC})}{A\mu(G_{IC})}\right) = \exp(\ln(r_e)) \quad (S12)$$

$$r_e = \exp\left(\frac{\sigma(G_{IC}) - B\mu(G_{IC})}{A\mu(G_{IC})}\right) \quad (S13)$$

### S3. Deduction of the analytical relation between $\frac{\sigma}{\mu}(G_{IC})$ and $\frac{\sigma}{\mu}(f_t)$ :

Finally, considering the last form presented in Equation (S8) and Equation (S13), the following can be written:

$$\left(\frac{\mu(f_t)c}{\sigma(f_t)}\right)^{\frac{1}{d}} = \exp\left(\frac{\sigma(G_{IC}) - B\mu(G_{IC})}{A\mu(G_{IC})}\right) \quad (S14)$$

$$\ln\left(\frac{\mu(f_t)c}{\sigma(f_t)}\right)^{\frac{1}{d}} = \ln\left(\exp\left(\frac{\sigma(G_{IC}) - B\mu(G_{IC})}{A\mu(G_{IC})}\right)\right) \quad (S15)$$

$$\frac{1}{d} \ln\left(\frac{c\mu(f_t)}{\sigma(f_t)}\right) = \frac{\sigma(G_{IC}) - B\mu(G_{IC})}{A\mu(G_{IC})} \quad (S16)$$

$$\frac{1}{d} \ln\left(\frac{\mu_{f_t}c}{\sigma(f_t)}\right) = \frac{\sigma(G_{IC})}{A\mu(G_{IC})} - \frac{B}{A} \quad (S17)$$

$$\frac{\sigma(G_{IC})}{\mu(G_{IC})} = A \left[ \frac{1}{d} \ln\left(\frac{\mu_{f_t}c}{\sigma_{f_t}}\right) + \frac{B}{A} \right] \quad (S18)$$
