# Supplementary material for: Determination of the Probabilistic Properties of the Critical Fracture Energy of Concrete Integrating Scale Effect Aspects
Source: MDPI journal article supplement (doi:10.3390/app14010462), 2024-01-04
Supplement: s1 [file s1]

Archive with 1 entries (1 files):
- supplementary_file.pdf
